# Supplementary material for: The amphoteric role of nitrogen in the NX2 unit within crystals
Source: Royal Society of Chemistry journal article supplement (doi:10.1039/d2ce01141g), 2022-01-01
Supplement: d2ce01141g1.pdf [file d2ce01141g1.pdf]

# The $\text{NX}_2$ Synthons in Crystals

Fernando Cortés-Guzmán,<sup>\*a,b</sup> Pablo Carpio-Matínez<sup>a</sup>, Juan de Dios Guzmán-Hernández<sup>b</sup> and Vojtech Jancik<sup>a,b</sup>

Supplementary information.

## Hirshfeld atom refinement

High resolution data and initial structure solution used for the Hirshfeld atom refinement (HAR) of  $\text{P}_3\text{N}_3\text{Cl}_6$  were published previously by us<sup>1</sup> and were used without any modification. The HAR was performed using olex.refine and NoSperA2<sup>2a</sup> incorporated in Olex2<sup>2b</sup> and Orca 5.0.1.<sup>3</sup> and was initiated by refining one molecule at the cc-VQZ/wB97X<sup>4</sup> level of theory. After achieving convergence Gram-Charlier coefficients up to 4<sup>th</sup> order were refined for all atoms due to the presence of residual density in the proximity of the atoms congruent with anharmonic motion. Thereafter, the structure was expanded using the space group symmetry to describe the  $\text{NCl}_2$  synthon and the obtained wavefunction that was analyzed using AIMALL.<sup>5</sup> This led to an almost featureless residual electron density map (Figure S1) and a gaussian distribution of the residual electron density in the fractal dimension analysis (Figure S2). Table S1 contains the refinement details and the final refinement indices.

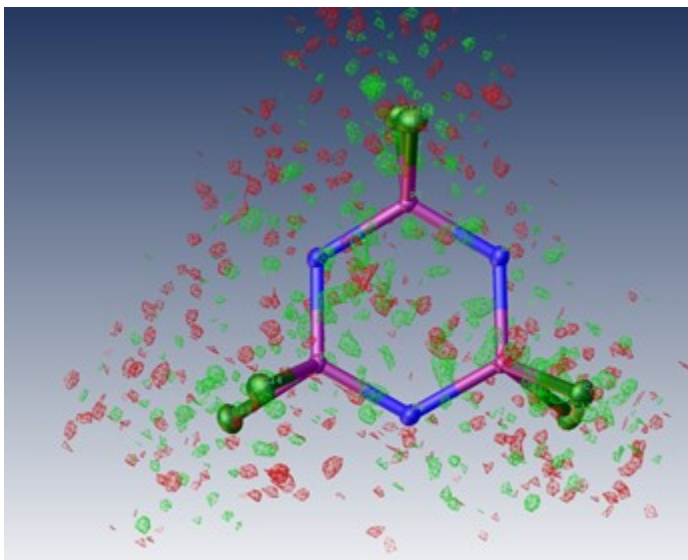

**Figure S1.** Molecular Structure of **1** obtained from the Hirshfeld Atom Refinement with thermal ellipsoid plots at 50% probability and the residual electron density (green = positive, red = negative) at 0.11  $\text{e} \cdot \text{\AA}^{-3}$ .

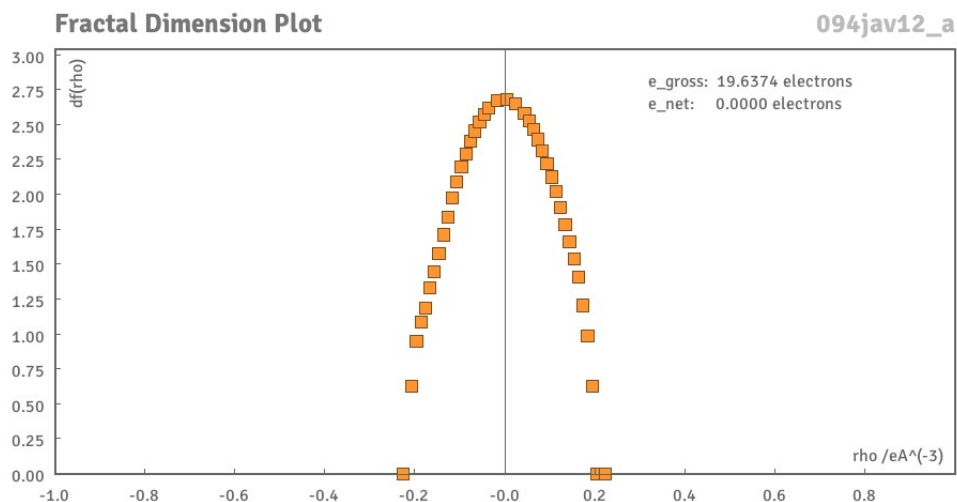

**Figure S2.** Fractal dimension analysis of the residual electron density after the final cycle of the Hirshfeld atom refinement of  $P_3N_3Cl_6$  (**1**).

**Table S1:** Data collection and Hirshfeld atom refinement details for **1**.

|                               |                     |
|-------------------------------|---------------------|
| formula                       | $Cl_6N_3P_3$        |
| fw                            | 347.657             |
| crystal system                | orthorhombic        |
| space group                   | <i>Pnma</i>         |
| temp, K                       | 100.15              |
| $\lambda$ , Å                 | 0.71073             |
| $a$ , Å                       | 13.8711(1)          |
| $b$ , Å                       | 12.8328(1)          |
| $c$ , Å                       | 6.0866(1)           |
| $\alpha$ , deg                | 90                  |
| $\beta$ , deg                 | 90                  |
| $\gamma$ , deg                | 90                  |
| $V$ , Å <sup>3</sup>          | 1083.45(2)          |
| $Z$                           | 4                   |
| $\rho$ , g·cm <sup>-3</sup>   | 2.131               |
| $\mu$ , mm <sup>-1</sup>      | 1.978               |
| $F(000)$                      | 676.275             |
| crystal size, mm <sup>3</sup> | 0.116 x 0.1 x 0.084 |

|                                                      |                                                                      |
|------------------------------------------------------|----------------------------------------------------------------------|
| $\theta$ range for data collection, deg              | 2.94 to 55.75                                                        |
| index ranges                                         | $-32 \leq h \leq 32$<br>$-29 \leq k \leq 29$<br>$-14 \leq l \leq 14$ |
| no. of reflns collected                              | 129988                                                               |
| no. of indep. reflns ( $R_{\text{int}}$ )            | 7300 (0.0197)                                                        |
| no. of data / restraints / parameters                | 7300 / 0 / 221                                                       |
| GoF on $F^2$                                         | 1.1475                                                               |
| $R_1,^a wR_2^b (I > 2\sigma(I))$                     | 0.0085, 0.0132                                                       |
| $R_1,^a wR_2^b$ (all data)                           | 0.0115, 0.0137                                                       |
| largest diff. peak / hole, $e \cdot \text{\AA}^{-3}$ | 0.1909 / -0.1917                                                     |

<sup>a</sup>  $R_1 = \sum ||F_o| - |F_c|| / \sum |F_o|$ . <sup>b</sup>  $wR_2 = [\sum w(F_o^2 - F_c^2)^2 / \sum (F_o^2)^2]^{1/2}$ .

## Geometry

**Table S2**

| HAR of the $\text{P}_3\text{N}_3\text{Cl}_6$ trimer |           |          |           |
|-----------------------------------------------------|-----------|----------|-----------|
| Name                                                | X         | Y        | Z         |
| Cl1                                                 | 10.433483 | 6.062619 | 0.913875  |
| Cl2                                                 | 23.539773 | 6.062619 | 16.339135 |
| Cl3                                                 | 23.539773 | 6.062619 | 4.837128  |
| P4                                                  | 11.512304 | 6.062619 | 4.513176  |
| P5                                                  | 24.618594 | 6.062619 | 12.739834 |
| P6                                                  | 24.618594 | 6.062619 | 1.237827  |
| N7                                                  | 12.924104 | 3.498586 | 5.109582  |
| N8                                                  | 12.924104 | 8.626653 | 5.109582  |
| N9                                                  | 26.030394 | 3.498586 | 0.641421  |
| N10                                                 | 26.030394 | 3.498586 | 12.143428 |
| N11                                                 | 26.030394 | 8.626653 | 12.143428 |
| N12                                                 | 26.030394 | 8.626653 | 0.641421  |
| P13                                                 | 15.602634 | 8.663107 | 6.421665  |
| P14                                                 | 15.602634 | 3.462132 | 6.421665  |
| P15                                                 | 28.708924 | 8.663107 | -0.670661 |

|      |           |           |           |
|------|-----------|-----------|-----------|
| P16  | 28.708924 | 8.663107  | 10.831346 |
| P17  | 28.708924 | 3.462132  | 10.831346 |
| P18  | 28.708924 | 3.462132  | -0.670661 |
| CI19 | 8.188812  | 6.062619  | 6.288112  |
| CI20 | 21.295102 | 6.062619  | 10.964898 |
| CI21 | 21.295102 | 6.062619  | -0.537109 |
| N22  | 17.012643 | 6.062619  | 6.834231  |
| N23  | 30.118933 | 6.062619  | 10.41878  |
| N24  | 30.118933 | 6.062619  | -1.083227 |
| CI25 | 17.890434 | 10.942353 | 4.506833  |
| CI26 | 17.890434 | 1.182886  | 4.506833  |
| CI27 | 30.996724 | 10.942353 | 1.244171  |
| CI28 | 30.996724 | 10.942353 | 12.746178 |
| CI29 | 30.996724 | 1.182886  | 12.746178 |
| CI30 | 30.996724 | 1.182886  | 1.244171  |
| CI31 | 15.338699 | 10.416767 | 9.746837  |
| CI32 | 15.338699 | 1.708472  | 9.746837  |
| CI33 | 28.44499  | 10.416767 | -3.995834 |
| CI34 | 28.44499  | 10.416767 | 7.506173  |
| CI35 | 28.44499  | 1.708472  | 7.506173  |
| CI36 | 28.44499  | 1.708472  | -3.995834 |

k-means

**Table S3**

| NCl <sub>2</sub> |   | NBr <sub>2</sub> |   | NI <sub>2</sub> |   |
|------------------|---|------------------|---|-----------------|---|
| DESKER           | 1 | YARVOE           | 0 | TUNXIM          | 0 |
| PICCIN           | 1 | VUZJOQ           | 0 | UXAROD          | 0 |
| MERVAJ           | 1 | KELGEO03         | 0 | UXARIX          | 0 |
| ORUHOZ           | 1 | BRMALN           | 0 | OPUPUN          | 0 |
| XIYVOQ           | 1 | SOMKIO           | 0 | OLOWOE          | 0 |
| BAWNIW           | 1 | DADRIK           | 0 | DIXXIS          | 0 |
| ROKCAV           | 1 | QUMSUO           | 0 | IMUQUE          | 0 |
| MERVAJ           | 1 | YARVOE           | 1 | MOSFOQ          | 0 |
| TUMJAM           | 1 | YARVOE           | 1 | IHUNUU          | 0 |

|          |   |  |          |   |  |          |   |
|----------|---|--|----------|---|--|----------|---|
| PICCIN   | 1 |  | MOTZIE   | 1 |  | FIWPUZ   | 0 |
| ETEYIM   | 1 |  | PONWAR   | 1 |  | REZQOF02 | 0 |
| WAPSIS   | 1 |  | BAQPAL   | 1 |  | LUKWAS03 | 0 |
| ETEYIM   | 1 |  | UXOBUG   | 1 |  | HOWXAU   | 0 |
| CMTIPH   | 1 |  | BAQPAL   | 1 |  | XUYBAV   | 0 |
| NAJGEN   | 1 |  | REMBUI   | 1 |  | YEXVIJ   | 0 |
| XIYVOQ   | 1 |  | LETDIY   | 1 |  | CACVUA   | 0 |
| POFFEX   | 1 |  | YARVOE   | 1 |  | QAXPAK   | 0 |
| CMTIPH   | 1 |  | BRBZNT01 | 1 |  | IMUREP   | 0 |
| CAXQUP   | 1 |  | BELZOK   | 1 |  | SAJDEP   | 0 |
| MEBGOR   | 1 |  | WIBGIA   | 1 |  | IMUROZ   | 0 |
| SIXNAQ   | 1 |  | RADTEW   | 2 |  | PERLAC   | 0 |
| CUCGOY   | 1 |  | LURFIO   | 2 |  | IMURAL   | 0 |
| NEFJOZ   | 1 |  | COPZIS   | 2 |  | TAXZAW01 | 0 |
| MEBGUX   | 1 |  | PEXNIQ07 | 2 |  | UCEGOC   | 0 |
| IYEKUV   | 1 |  | HIJKER   | 2 |  | LAGGOT   | 1 |
| DEPVUS   | 1 |  | OFIZAF   | 2 |  | VIXXAE   | 1 |
| ADULEQ   | 1 |  | VEGGUK   | 2 |  | ECASAE   | 1 |
| GINHAP   | 1 |  | UKIXAO   | 2 |  | HEZFUP   | 1 |
| ETEYIM   | 2 |  | HIZYIB   | 3 |  | HEZCOH   | 1 |
| MCPZSI   | 2 |  | HIQYUE   | 3 |  | HIRVOV   | 1 |
| IMIQUIT  | 2 |  | HUYUYV   | 3 |  | TUWQIO01 | 1 |
| GAKNEL   | 2 |  | YEDTIL   | 3 |  | ANUPOP   | 2 |
| KUMJEH   | 2 |  | BARKOX   | 3 |  | VIHFIC   | 2 |
| BATBII   | 2 |  | BEVFOA   | 3 |  | TOJCEB   | 2 |
| PADHIL   | 2 |  | EZIBIA   | 4 |  | HURNEQ   | 2 |
| HIDFAB   | 2 |  | IPOCIB   | 5 |  | HURNIU   | 2 |
| IFULUQ02 | 2 |  | IKABAZ   | 5 |  | HURNIU   | 2 |
| RUSCAM   | 2 |  | HIRWIQ   | 5 |  | HURNIU   | 2 |
| FUBXOQ   | 2 |  | VABBAF   | 5 |  | UZULOT   | 2 |
| KOVVOJ   | 2 |  | LETDIY   | 5 |  | HURNIU   | 2 |
| CUGBAK   | 2 |  | UKIWUH   | 5 |  | HURNEQ   | 2 |
| UKIWOB   | 2 |  | WIWBOV   | 5 |  | HURNIU   | 2 |
| KUHGAV   | 2 |  | INADAE   | 5 |  | UZUCIE   | 2 |
| YAVCUT   | 2 |  | IKABAZ   | 5 |  | AQECEH   | 3 |
| RAZCIE   | 2 |  | IKABAZ   | 6 |  | LAGHEK   | 3 |
| LEMREA   | 2 |  | UKIWUH   | 6 |  | YIQYOP   | 3 |
| HEJGAE   | 2 |  | CONQOL   | 6 |  | LAZYOD   | 3 |
| KECRAN   | 2 |  | UKIWUH   | 6 |  | LAZYOD   | 3 |
| DUHRAA   | 2 |  | XESVUP   | 6 |  | LAGGOT   | 3 |
| SIFKOI   | 2 |  | SERDEB   | 6 |  | XAFBAL   | 3 |

|          |   |  |          |   |  |          |   |
|----------|---|--|----------|---|--|----------|---|
| QEKUCUE  | 2 |  | OWURIJ   | 6 |  | ENIGIR   | 3 |
| RIHJAV   | 2 |  | UKIWUH   | 6 |  | XAFBAL   | 3 |
| IDELUC   | 2 |  | WIWBOV   | 6 |  | XUXMAH   | 3 |
| HEJGAE   | 2 |  | VENBEW   | 6 |  | LILMEA   | 3 |
| FARQAR   | 2 |  | YIFDOH   | 6 |  | HEZGAW   | 3 |
| SUPFUE   | 2 |  | NOPWEX   | 6 |  | XAFBEP   | 3 |
| FELPIV   | 2 |  | DBPDZC   | 7 |  | XUXMAH   | 3 |
| BEDNFE   | 2 |  | IKABAZ   | 7 |  | LOXFOV   | 3 |
| ETEYIM   | 2 |  | BTCYME   | 7 |  | KOVGEH   | 3 |
| GIPHUI   | 2 |  | WAWFUY   | 7 |  | XUXMAH   | 3 |
| FEGDIF   | 2 |  | DEGREG   | 7 |  | LAZYOD   | 3 |
| TUMJAM   | 2 |  | OZEBAZ   | 7 |  | LAZYOD   | 3 |
| UZETUQ   | 2 |  | POWBEL   | 7 |  | XUXMAH   | 3 |
| BUXMIT   | 2 |  | KIXZIB   | 8 |  | UXARIX   | 3 |
| FEGDIF   | 2 |  | PEVWOE   | 8 |  | XAFBEP   | 3 |
| EGOQOI   | 3 |  | XAZLOA   | 8 |  | LAZYOD   | 3 |
| ECIGAB   | 3 |  | XAZLOA   | 8 |  | TIPJUA   | 4 |
| GASHIU   | 4 |  | AGATIN01 | 8 |  | LATFUJ   | 4 |
| EKAVIV   | 4 |  | HIZYIB   | 8 |  | LIQVOY   | 4 |
| JITXOZ   | 4 |  | SOKJUJ   | 8 |  | BUNGEY   | 4 |
| PUYPUV   | 4 |  | DADSEH01 | 8 |  | PERLAC   | 4 |
| HIDFAB   | 4 |  | UKIXAO   | 8 |  | KIVCEA   | 4 |
| BAWMUH   | 4 |  | YARVOE   | 8 |  | YARTAO   | 4 |
| YIGSIR   | 4 |  | WOZMUW   | 9 |  | YANPIP   | 5 |
| PIJBIT   | 4 |  | EPUSAM   | 9 |  | TAWFEF   | 5 |
| ENAJOU   | 4 |  | WALYIS   | 9 |  | TEPKUW   | 5 |
| KAYRUY   | 4 |  | HIZYIB   | 9 |  | HIXVUI   | 5 |
| VIHHUP   | 4 |  | HIZYIB   | 9 |  | GAKGEF   | 5 |
| IFULUQ02 | 4 |  | LIZPEQ   | 9 |  | YANPIP   | 5 |
| HOXBIH   | 4 |  | AWIWOV   | 9 |  | GAKGAB   | 5 |
| NEWYOF   | 4 |  | IKABAZ   | 9 |  | LAGHEK   | 5 |
| IDITIB   | 4 |  | NAWYAM   | 9 |  | EFUGIX   | 5 |
| IFULUQ02 | 4 |  | TAJHIZ   | 9 |  | QINDOI   | 5 |
| ETEYIM   | 4 |  | YARVOE   | 9 |  | SODBET   | 5 |
| FEDVER   | 4 |  | DADRUW   | 9 |  | OJIKEZ   | 5 |
| ZAMWAL   | 4 |  | IKEFOV   | 9 |  | YANPIP   | 5 |
| GASHIU   | 4 |  |          |   |  | QINPEK01 | 5 |
| KEKFAJ   | 4 |  |          |   |  | YIQYOP   | 5 |
| AGUVII   | 4 |  |          |   |  | IOBNIT18 | 5 |
| PIJBOZ   | 4 |  |          |   |  | WIBGEW   | 6 |
| ORUJAN   | 4 |  |          |   |  | WIBGEW   | 6 |

|         |   |  |  |  |          |   |
|---------|---|--|--|--|----------|---|
| QOBJUM  | 4 |  |  |  | ROYDAM   | 6 |
| VAHGUH  | 4 |  |  |  | OPUPUN   | 6 |
| HAZWIQ  | 4 |  |  |  | FAZXAI   | 6 |
| GASJIW  | 4 |  |  |  | PEPQIN   | 6 |
| WEDWIM  | 4 |  |  |  | OCIQUN   | 6 |
| TUMJAM  | 4 |  |  |  | VIXXAE   | 6 |
| PICCIN  | 4 |  |  |  | PESZOE   | 6 |
| WARYAQ  | 4 |  |  |  | EFUGET   | 6 |
| GUZLIX  | 4 |  |  |  | BOWRUC02 | 6 |
| CUCGOY  | 4 |  |  |  | UNOGEJ   | 6 |
| TIYDAI  | 4 |  |  |  | HURNIU   | 7 |
| PESBAT  | 4 |  |  |  | UZULOT   | 7 |
| MEBGUX  | 4 |  |  |  | GUYLAQ   | 7 |
| MEBGOR  | 4 |  |  |  | GUYKUJ   | 7 |
| PALPAV  | 4 |  |  |  | HEZGAW   | 7 |
| VECWEH  | 4 |  |  |  | HEZFUP   | 7 |
| UZOPIK  | 4 |  |  |  | TEPKUW   | 8 |
| HAZWIQ  | 4 |  |  |  | TAWFEF   | 8 |
| NICXII  | 5 |  |  |  | YANPIP   | 8 |
| ETHEYIM | 5 |  |  |  | YINYEAE  | 8 |
| KOVVOJ  | 5 |  |  |  | SAJDEP   | 8 |
| CUCGOY  | 5 |  |  |  | EFUGIX   | 8 |
| NEBFIJ  | 5 |  |  |  | TAWFEF   | 8 |
| GOHYOR  | 5 |  |  |  | YANPIP   | 8 |
| HAYJEW  | 5 |  |  |  | TEPKUW   | 8 |
| CUCGOY  | 5 |  |  |  | YOGKOX   | 8 |
| PUYQAC  | 5 |  |  |  | DIXXIS   | 8 |
| XAKREH  | 5 |  |  |  | YANPIP   | 8 |
| OXASEN  | 5 |  |  |  | SUZFUR   | 9 |
| PICCIN  | 5 |  |  |  | ZOBBEZ   | 9 |
| PUYQIK  | 5 |  |  |  | NEJVIJ   | 9 |
| XIYVOQ  | 5 |  |  |  | NINSEL   | 9 |
| ETHEYIM | 5 |  |  |  | XAYLUH   | 9 |
| IPOJOP  | 5 |  |  |  | LUKWOG   | 9 |
| DUWKAI  | 5 |  |  |  | OJIHIA   | 9 |
| ETHEYIM | 5 |  |  |  | HEZCUN   | 9 |
| TUKZEE  | 5 |  |  |  | OJIGUL   | 9 |
| CUCGOY  | 5 |  |  |  |          |   |
| CUCGOY  | 5 |  |  |  |          |   |
| CUCGOY  | 5 |  |  |  |          |   |
| BATBAA  | 5 |  |  |  |          |   |

|        |   |  |  |  |  |  |  |
|--------|---|--|--|--|--|--|--|
| RIHLUP | 5 |  |  |  |  |  |  |
| DITJAS | 6 |  |  |  |  |  |  |
| XIZHIX | 6 |  |  |  |  |  |  |
| RIDLOH | 6 |  |  |  |  |  |  |
| GAWBAL | 6 |  |  |  |  |  |  |
| OFIFEQ | 6 |  |  |  |  |  |  |
| WILLUA | 6 |  |  |  |  |  |  |
| WILLEK | 6 |  |  |  |  |  |  |
| HIDFAB | 6 |  |  |  |  |  |  |
| WILLOU | 6 |  |  |  |  |  |  |
| BEXNAV | 6 |  |  |  |  |  |  |
| SARMUX | 6 |  |  |  |  |  |  |
| NEFJOZ | 6 |  |  |  |  |  |  |
| EWIMEC | 6 |  |  |  |  |  |  |
| JALZAB | 7 |  |  |  |  |  |  |
| FOGDAJ | 7 |  |  |  |  |  |  |
| SULCOT | 7 |  |  |  |  |  |  |
| ZIZDOD | 7 |  |  |  |  |  |  |
| YOPTAZ | 7 |  |  |  |  |  |  |
| PUPWII | 7 |  |  |  |  |  |  |
| BEDNFE | 7 |  |  |  |  |  |  |
| SOQKAN | 7 |  |  |  |  |  |  |
| ICUTOT | 7 |  |  |  |  |  |  |
| JIYCAV | 7 |  |  |  |  |  |  |
| JODRAX | 7 |  |  |  |  |  |  |
| JIYCAV | 7 |  |  |  |  |  |  |
| SANGUN | 7 |  |  |  |  |  |  |
| RATMOO | 7 |  |  |  |  |  |  |
| OSEDEX | 7 |  |  |  |  |  |  |
| TULJIT | 7 |  |  |  |  |  |  |
| RATMOO | 7 |  |  |  |  |  |  |
| LEMREA | 7 |  |  |  |  |  |  |
| OSDIB  | 7 |  |  |  |  |  |  |
| PEVPEL | 7 |  |  |  |  |  |  |
| GEHFEF | 7 |  |  |  |  |  |  |
| IQONEK | 7 |  |  |  |  |  |  |
| PUYQAC | 7 |  |  |  |  |  |  |
| JODRAX | 7 |  |  |  |  |  |  |
| LEMREA | 7 |  |  |  |  |  |  |
| CAZCHO | 7 |  |  |  |  |  |  |
| POTCAD | 7 |  |  |  |  |  |  |



|          |   |  |  |  |  |  |  |
|----------|---|--|--|--|--|--|--|
| PEVPEL   | 7 |  |  |  |  |  |  |
| IJOLEZ   | 7 |  |  |  |  |  |  |
| DEYJOG   | 7 |  |  |  |  |  |  |
| BALZIZ   | 7 |  |  |  |  |  |  |
| RUFXUM   | 7 |  |  |  |  |  |  |
| KEKFAJ   | 7 |  |  |  |  |  |  |
| OTEHEC   | 7 |  |  |  |  |  |  |
| ENAJOU   | 7 |  |  |  |  |  |  |
| GAYMIF   | 7 |  |  |  |  |  |  |
| TIGWOW   | 7 |  |  |  |  |  |  |
| XEFHIA   | 7 |  |  |  |  |  |  |
| CADGAR   | 7 |  |  |  |  |  |  |
| QAFKER   | 7 |  |  |  |  |  |  |
| XAZWAX   | 7 |  |  |  |  |  |  |
| GAYMIF   | 7 |  |  |  |  |  |  |
| NAXYIW   | 7 |  |  |  |  |  |  |
| UKIWOB   | 7 |  |  |  |  |  |  |
| IFULUQ02 | 7 |  |  |  |  |  |  |
| JITXOZ   | 7 |  |  |  |  |  |  |
| ZIJZEX   | 7 |  |  |  |  |  |  |
| DUHRAA   | 7 |  |  |  |  |  |  |
| SACFEH   | 7 |  |  |  |  |  |  |
| IMIQUT   | 7 |  |  |  |  |  |  |
| CEBBIX   | 7 |  |  |  |  |  |  |
| KECRAN   | 7 |  |  |  |  |  |  |
| NOSQUH   | 7 |  |  |  |  |  |  |
| WUCDAB   | 7 |  |  |  |  |  |  |
| YOSHOD10 | 8 |  |  |  |  |  |  |
| PUYQAC   | 8 |  |  |  |  |  |  |
| MERMII   | 8 |  |  |  |  |  |  |
| PUYQAC   | 8 |  |  |  |  |  |  |
| KECRAN   | 8 |  |  |  |  |  |  |
| REYLAJ   | 8 |  |  |  |  |  |  |
| HOGBUC   | 8 |  |  |  |  |  |  |
| FOGDAJ   | 8 |  |  |  |  |  |  |
| GINHAP   | 8 |  |  |  |  |  |  |
| BATBAA   | 8 |  |  |  |  |  |  |
| MUPHAJ   | 8 |  |  |  |  |  |  |
| MOCCEM   | 8 |  |  |  |  |  |  |
| BASZUR   | 8 |  |  |  |  |  |  |
| JAQLOF   | 8 |  |  |  |  |  |  |

|          |   |  |  |  |  |  |  |
|----------|---|--|--|--|--|--|--|
| YOSHOD10 | 8 |  |  |  |  |  |  |
| BATBAA   | 8 |  |  |  |  |  |  |
| BUSRAJ   | 8 |  |  |  |  |  |  |
| PUYQAC   | 8 |  |  |  |  |  |  |
| EXEZAK   | 8 |  |  |  |  |  |  |
| TETREQ   | 9 |  |  |  |  |  |  |
| OFUVAM   | 9 |  |  |  |  |  |  |
| PEVPEL   | 9 |  |  |  |  |  |  |
| WANQAE   | 9 |  |  |  |  |  |  |
| LULMEL   | 9 |  |  |  |  |  |  |
| SIXNAQ   | 9 |  |  |  |  |  |  |
| SOPNEQ   | 9 |  |  |  |  |  |  |
| SOPNEQ   | 9 |  |  |  |  |  |  |
| KECSUG   | 9 |  |  |  |  |  |  |
| KOVVOJ   | 9 |  |  |  |  |  |  |
| KADTUE01 | 9 |  |  |  |  |  |  |
| FEDVER   | 9 |  |  |  |  |  |  |
| FEDVER   | 9 |  |  |  |  |  |  |
| ATOVIQ   | 9 |  |  |  |  |  |  |
| PAHCIK   | 9 |  |  |  |  |  |  |
| GAYMIF   | 9 |  |  |  |  |  |  |
| PUYZIV   | 9 |  |  |  |  |  |  |
| JITXOZ   | 9 |  |  |  |  |  |  |
| SOPNEQ   | 9 |  |  |  |  |  |  |
| POVNOD   | 9 |  |  |  |  |  |  |
| LOLSUA   | 9 |  |  |  |  |  |  |
| CTHDZO   | 9 |  |  |  |  |  |  |
| NIZDIM   | 9 |  |  |  |  |  |  |
| POVNOD   | 9 |  |  |  |  |  |  |
| TETREQ   | 9 |  |  |  |  |  |  |
| NABJIL   | 9 |  |  |  |  |  |  |
| HIGMUH   | 9 |  |  |  |  |  |  |
| WILLAG   | 9 |  |  |  |  |  |  |
| AHOGUB   | 9 |  |  |  |  |  |  |
| NOPREP   | 9 |  |  |  |  |  |  |
| GIRVEI   | 9 |  |  |  |  |  |  |
| UQIBAY   | 9 |  |  |  |  |  |  |
| WUDDAD   | 9 |  |  |  |  |  |  |
| NOWBOT   | 9 |  |  |  |  |  |  |
| BOFVOI   | 9 |  |  |  |  |  |  |
| ISUNUH   | 9 |  |  |  |  |  |  |

|        |    |  |  |  |  |  |
|--------|----|--|--|--|--|--|
| TRAZSB | 9  |  |  |  |  |  |
| AHIWEV | 9  |  |  |  |  |  |
| ZUXRER | 9  |  |  |  |  |  |
| BARZAY | 9  |  |  |  |  |  |
| SIXNAQ | 9  |  |  |  |  |  |
| HOGHIX | 9  |  |  |  |  |  |
| PATTAG | 9  |  |  |  |  |  |
| WILKUZ | 9  |  |  |  |  |  |
| OCOXUD | 9  |  |  |  |  |  |
| HAFMIL | 9  |  |  |  |  |  |
| AXODID | 9  |  |  |  |  |  |
| POVKUI | 9  |  |  |  |  |  |
| PUYPUV | 10 |  |  |  |  |  |
| PIMXUH | 10 |  |  |  |  |  |
| IYEKUV | 10 |  |  |  |  |  |
| CUCGOY | 10 |  |  |  |  |  |
| CUCGOY | 10 |  |  |  |  |  |
| GASYIM | 10 |  |  |  |  |  |
| GURVIZ | 10 |  |  |  |  |  |

**Table S4**

| <b>k Cluster</b>       | <b>Molecules in k-cluster</b> | <b>Prototype structure</b> |
|------------------------|-------------------------------|----------------------------|
| <b>NCI<sub>2</sub></b> |                               |                            |
| 1                      | 28                            | DESKER                     |
| 2                      | 37                            | FUBXOQ                     |
| 3                      | 2                             | EGOQOI                     |
| 4                      | 42                            | PICCIN                     |
| 5                      | 24                            | PUYQIK                     |
| 6                      | 13                            | BEXNAV                     |
| 7                      | 54                            | RUFUM                      |
| 8                      | 19                            | KECRAN                     |
| 9                      | 48                            | NOPREP                     |
| 10                     | 7                             | PIMXUH                     |
| <b>NBr<sub>2</sub></b> |                               |                            |
| 1                      | 7                             | YARVOE                     |
| 2                      | 13                            | REMBUI                     |
| 3                      | 8                             | VEGGUK                     |
| 4                      | 6                             | HIQYUE                     |
| 5                      | 1                             | EZIBIA                     |
| 6                      | 9                             | WIWBOV                     |

|                       |    |        |
|-----------------------|----|--------|
| 7                     | 12 | UKIWUH |
| 8                     | 7  | DBPDZC |
| 9                     | 10 | UKIXAO |
| 10                    | 13 | HIZYIB |
| <b>Ni<sub>2</sub></b> |    |        |
| 1                     | 24 | TUNXIM |
| 2                     | 7  | VIXXAE |
| 3                     | 12 | VIHFIC |
| 4                     | 23 | LAZYOD |
| 5                     | 7  | BUNGEY |
| 6                     | 16 | GAKGAB |
| 7                     | 12 | PESZOE |
| 8                     | 6  | HEZGAW |
| 9                     | 12 | YANPIP |
| 10                    | 9  | OJIHIA |

Local properties

a. Bond critical points

**1 HAR**

| <b>BCP #</b> | <b>Atoms</b>       | <b>Rho</b> | <b>DelSqRho</b> | <b>Ellipticity</b> | <b>G</b> | <b>V</b> | <b>DI(A B)</b> |
|--------------|--------------------|------------|-----------------|--------------------|----------|----------|----------------|
| 11           | Cl20 - N22         | 0.009      | 0.034           | 0.016              | 0.007    | -0.005   | 0.071          |
| 17           | Cl3 - N22          | 0.004      | 0.014           | 0.007              | 0.003    | -0.002   | 0.028          |
| 19           | Cl3 - Cl20         | 0.007      | 0.026           | 0.011              | 0.005    | -0.004   | 0.063          |
| <b>RCP #</b> | <b>Atoms</b>       | <b>Rho</b> | <b>DelSqRho</b> |                    | <b>G</b> | <b>V</b> |                |
| 8            | -Cl3 - Cl20 - N22- | 0.003      | 0.011           |                    | 0.002    | -0.001   |                |

**1 DFT**

| <b>BCP #</b> | <b>Atoms</b> | <b>Rho</b> | <b>DelSqRho</b> | <b>Ellipticity</b> | <b>G</b> | <b>V</b> | <b>DI(A B)</b> |
|--------------|--------------|------------|-----------------|--------------------|----------|----------|----------------|
| 13           | Cl7 - N13    | 0.009      | 0.031           | 0.020              | 0.006    | -0.005   | 0.073          |
| 39           | Cl7 - Cl32   | 0.007      | 0.025           | 0.031              | 0.005    | -0.003   | 0.066          |
| 40           | N13 - Cl32   | 0.004      | 0.013           | 0.045              | 0.003    | -0.002   | 0.030          |
| <b>RCP #</b> | <b>Atoms</b> | <b>Rho</b> | <b>DelSqRho</b> |                    | <b>G</b> | <b>V</b> |                |

|    |                    |       |       |  |       |        |  |
|----|--------------------|-------|-------|--|-------|--------|--|
| 11 | -Cl7 – Cl32 – N13- | 0.003 | 0.011 |  | 0.002 | -0.002 |  |
|----|--------------------|-------|-------|--|-------|--------|--|

b. Critical points of the Laplacian of the electron density

| <b>HAR P<sub>3</sub>N<sub>3</sub>Cl<sub>6</sub> trimer</b> |            |                 |                 |
|------------------------------------------------------------|------------|-----------------|-----------------|
| <b>CP #</b>                                                | <b>Rho</b> | <b>DelSqRho</b> | <b>Distance</b> |
| <b>N22</b>                                                 |            |                 |                 |
| 8                                                          | 0.502      | -1.890          | 0.749           |
| <b>C13</b>                                                 |            |                 |                 |
| 21                                                         | 0.268      | -0.742          | 1.180           |
| 24                                                         | 0.215      | -0.342          | 1.218           |
| 34                                                         | 0.068      | 0.125           | 1.965           |
| <b>Cl20</b>                                                |            |                 |                 |
| 18                                                         | 0.214      | -0.335          | 1.218           |
| 24                                                         | 0.270      | -0.754          | 1.179           |
| 44                                                         | 0.066      | 0.150           | 1.861           |

| <b>DFT P<sub>3</sub>N<sub>3</sub>Cl<sub>6</sub> trimer</b> |            |                 |                 |
|------------------------------------------------------------|------------|-----------------|-----------------|
| <b>CP #</b>                                                | <b>Rho</b> | <b>DelSqRho</b> | <b>Distance</b> |
| <b>N13</b>                                                 |            |                 |                 |
| 112                                                        | 0.486      | -1.721          | 0.766           |
| 121                                                        | 0.134      | 0.247           | 1.381           |
| <b>C17</b>                                                 |            |                 |                 |
| 38                                                         | 0.069      | 0.158           | 1.827           |
| 19                                                         | 0.210      | -0.367          | 1.224           |
| 25                                                         | 0.270      | -0.816          | 1.186           |
| <b>Cl32</b>                                                |            |                 |                 |
| 92                                                         | 0.069      | 0.155           | 1.829           |
| 74                                                         | 0.211      | -0.373          | 1.224           |
| 72                                                         | 0.268      | -0.793          | 1.186           |

Integrated properties

| HAR $P_3N_3Cl_6$ trimer |        |        |         |         |       |       |                |
|-------------------------|--------|--------|---------|---------|-------|-------|----------------|
| Atom                    | q(A)   | N(A)   | K(A)    | K_s     | Mu(A) | Q(A)  | Vol(A) (0.001) |
| Cl3                     | -0.638 | 17.638 | 459.388 | 459.388 | 0.983 | 0.254 | 218.110        |
| Cl20                    | -0.634 | 17.634 | 459.386 | 459.386 | 0.984 | 0.337 | 214.536        |
| N22                     | -2.177 | 9.177  | 55.693  | 55.693  | 0.873 | 0.496 | 127.445        |

| DFT $P_3N_3Cl_6$ trimer |        |        |         |          |       |       |                |
|-------------------------|--------|--------|---------|----------|-------|-------|----------------|
| Atom                    | q(A)   | N(A)   | K(A)    | K_s      | Mu(A) | Q(A)  | Vol(A) (0.001) |
| Cl7                     | -0.537 | 17.537 | 459.563 | -460.408 | 0.567 | 0.976 | 219.931        |
| Cl32                    | -0.532 | 17.532 | 459.570 | -460.415 | 1.476 | 1.226 | 216.993        |
| N13                     | -2.050 | 9.050  | 55.646  | -55.748  | 0.374 | 1.296 | 125.258        |

Molecules of **1**: A, B and C

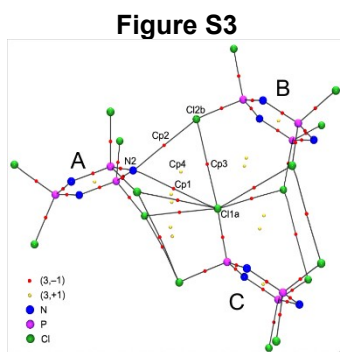

Classification of interactions

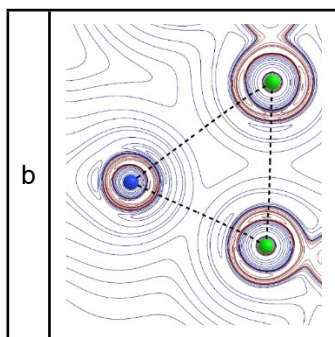

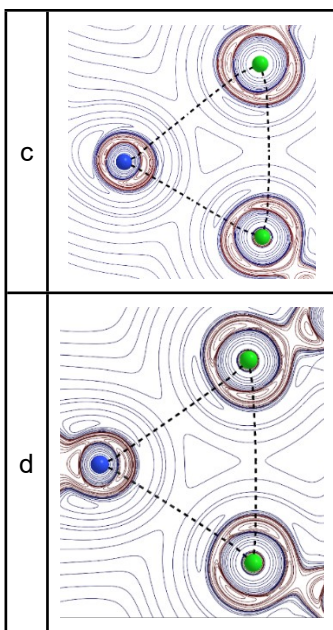

## References

1. Jancik, V.; Cortés-Guzmán, F.; Herbst-Irmer, R.; Matínez-Otero, D. *Chem. Eur. J.* **2017**, *23*, 6964.
2. a) Dolomanov, O. V.; Bourhis, L. J.; Gildea, R. J.; Howard, J. A. K.; Puschmann, H. OLEX2: a complete structure solution, refinement and analysis program. *J. Appl. Cryst.* 2009, *42*, 339–341. b) Kleemiss, F.; Dolomanov, O. V.; Bodensteiner, M.; Peyerimhoff, N.; Midgley, L.; Bourhis, L. J.; Genoni, A.; Malaspina, L. A.; Jayatilaka, D.; Spencer, J. L.; White, F.; Grundkötter-Stock, B.; Steinhauer, S.; Lentz, D.; Puschmann, H.; Grabowsky, S. Accurate crystal structures and chemical properties from NoSpherA2. *Chem. Sci.* 2021, *12*, 1675–1692.
3. Neese, F.; Wennmohs, F.; Becker, U.; Riplinger, C. The ORCA quantum chemistry program package. *J. Chem. Phys.* 2020, *152*, 224108.
4. J.-D. Chai and M. Head-Gordon, “Systematic optimization of long-range corrected hybrid density functionals,” *J. Chem. Phys.*, 128 (2008) 084106.
5. Keith, T. A. AIMAll (Version 15.09.12), TK Gristmill Software, Overland Park KS, USA, 2015, (aim.tkgristmill.com).
